# Supplementary material
Source: PubMed Central journal article supplement (PMC3754205)
Supplement: IAI.00097-13_zii999090270so1.pdf [file IAI.00097-13_zii999090270so1.pdf]

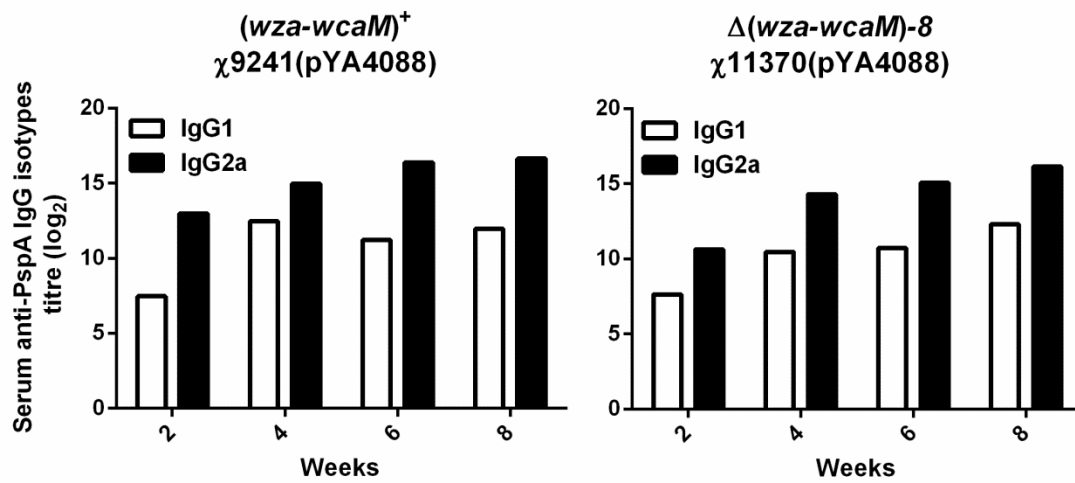

Fig. S1. **Serum IgG1 and IgG2a responses to rPspA measured by ELISA.** The data represent IgG1 and IgG2a subclass antibody levels to rPspA in pooled sera from orally immunized mice with RASV strains attenuated by mutations conferring auxotrophy at various numbers of weeks after immunization. The inoculation doses were about  $10^9$ .
